# Supplementary material for: A FoodSafeR perspective on emerging food safety hazards and associated risks
Source: Frontiers journal article supplement (doi:10.3389/fsufs.2025.1646792), 2025-10-07
Supplement: Data_Sheet_1.pdf [file Data_Sheet_1.pdf]

## *Supplementary Material*

**Supplementary Table 1.** FoodSafeR Advisory Board and Consortium Members and Home Institutions.

| FoodSafeR Consortium Members                                                          | FoodSafeR Advisory Board Members                                                                          |
|---------------------------------------------------------------------------------------|-----------------------------------------------------------------------------------------------------------|
| Lauren <b>Alteio</b> , FFoQSI, Austria <sup>I</sup>                                   | Ranajit <b>Bandyopadhyay</b> , International Institute of Tropical Agriculture, Nigeria <sup>V</sup>      |
| Cristina <b>Fernandez</b> , IRIS Technology, Spain <sup>I</sup>                       | Bernard <b>Bottex</b> , EFSA, Italy                                                                       |
| Isay <b>Gonzalez</b> , IRIS Technology, Spain <sup>I</sup>                            | Nathalie <b>de Cock</b> , Test Ankoop, Belgium <sup>I</sup>                                               |
| Rudolf <b>Krska</b> , FFoQSI, Austria <sup>I</sup>                                    | Eleonora <b>Dupouy</b> , FAO, Italy <sup>I</sup>                                                          |
| David Rodriguez <b>Lazaro</b> , University of Burgos, Spain <sup>I</sup>              | Chibundu N. <b>Ezekiel</b> , Babcock University, Nigeria <sup>I</sup>                                     |
| Oonagh <b>McNerney</b> , IRIS Technology, Spain <sup>I</sup>                          | Georg <b>Gallmetzer</b> , Zukunft Landwirtschaft, Italy <sup>I</sup>                                      |
| Dimitra <b>Mougekopetrou</b> , Agricultural University of Athens, Greece <sup>I</sup> | Chan Sheot Harn <b>Joanne</b> , Singapore Food Agency <sup>I</sup>                                        |
| Kostas <b>Papadimitriou</b> , Agricultural University of Athens, Greece <sup>I</sup>  | Lucie <b>Jurkaninova</b> , University Life Sciences Prague, Czech Republic <sup>I</sup>                   |
| Alexandra <b>Poch</b> , IRIS Technology, Spain <sup>I</sup>                           | Veronica <b>Lattanzio</b> , FoodSafety4EU, Italy <sup>V</sup>                                             |
| Michele <b>Suman</b> , Barilla, Italy <sup>I</sup>                                    | John F. <b>Leslie</b> , Kansas State University, USA <sup>V</sup>                                         |
| Alberto <b>Torres</b> , IRIS Technology, Spain <sup>I</sup>                           | James A. <b>Lindsay</b> , USDA, USA <sup>V</sup>                                                          |
| Mieke <b>Uyttendaele</b> , Ghent University, Belgium <sup>I</sup>                     | Emily <b>Macdougald</b> , Agence Federale pour la Securite de la Chaine Alimentaire, Belgium <sup>V</sup> |
|                                                                                       | Sheila <b>Okoth</b> , University Nairobi, Kenya <sup>V</sup>                                              |
|                                                                                       | Awanwee <b>Petchkongkaew</b> , Thammasat University, Thailand <sup>V</sup>                                |

| FoodSafeR Consortium Members                                                                                                            | FoodSafeR Advisory Board Members                                                                                                                                                                                                                                                                                                                                                                                                                                                                                                                                                                                                                                                                         |
|-----------------------------------------------------------------------------------------------------------------------------------------|----------------------------------------------------------------------------------------------------------------------------------------------------------------------------------------------------------------------------------------------------------------------------------------------------------------------------------------------------------------------------------------------------------------------------------------------------------------------------------------------------------------------------------------------------------------------------------------------------------------------------------------------------------------------------------------------------------|
| <p>Ine <b>van der Fels</b>, Wageningen University, Netherlands<sup>I</sup></p> <p>Martin <b>Wagner</b>, FFoQSI, Austria<sup>I</sup></p> | <p>Thea <b>Raw</b>n, Health Canada's Food Research Division, Canada<sup>V</sup></p> <p>Mark <b>Sumarah</b>, Agriculture and Agri-Food Canada<sup>V</sup></p> <p>Songxue <b>Wang</b>, Academy of National Food and Strategic Reserves Administration (ASAG), China<sup>V</sup></p> <p>Steve <b>Wearne</b>, UK Food Standards Agency and Vice Chair of Codex Alimentarius Commission, United Kingdom<sup>V</sup></p> <p>Felicia <b>Wu</b>, Michigan State University, USA<sup>V</sup></p> <p>Calvin <b>Yeo</b>, Singapore Food Agency<sup>I</sup></p> <p>Wu <b>Yongning</b>, China National Center for Food Safety Risk Assessment, China<sup>V</sup></p> <p>Kai <b>Zhang</b>, US FDA, USA<sup>I</sup></p> |

**Supplementary Table 2.** Questions Circulated to Participants Prior to the FoodSafeR Workshop.

|    |                                                                                                                                                                           |
|----|---------------------------------------------------------------------------------------------------------------------------------------------------------------------------|
| 1. | Which current / emerging microbiological and chemical food safety and food security hazards and associated risks have been a focus in your country / region / hemisphere? |
| 2. | For which emerging microbiological and chemical hazards and associated risks do we have to brace ourselves a) world wide and b) in your country / region?                 |
| 3. | Which strategies and tools are available to combat emerging food safety/security hazards and risks in your country / region?                                              |
| 4. | Please, provide your feedback to our FoodSafeR proposal - which hazards, risks and management strategies have not yet been addressed?                                     |
| 5. | Which options – e.g. external data sources or existing digital platforms/services – do you think could be useful to connect to our FoodSafeR open digital hub?            |
| 6. | Which options do you see to collaborate with FoodSafeR?                                                                                                                   |
| 7. | Where do you see needs for immediate action and the greatest benefit of our activities                                                                                    |

**Supplementary Table 3.** External Data Sources Workshop Participants Found Most Useful for Obtaining Food Safety Related Information.

| <b>Data Source</b>                                                                        | <b>Internet Reference</b>                                                                                                                                                                                                                                                 |
|-------------------------------------------------------------------------------------------|---------------------------------------------------------------------------------------------------------------------------------------------------------------------------------------------------------------------------------------------------------------------------|
| Austrian Agency for Health and Food Safety GmbH (AGES)                                    | <a href="https://www.ages.at/">https://www.ages.at/</a>                                                                                                                                                                                                                   |
| Government of Canada Open Data Portal                                                     | <a href="https://open.canada.ca/data">https://open.canada.ca/data</a>                                                                                                                                                                                                     |
| CANLINE                                                                                   | <a href="https://open.canada.ca/data/en/dataset/01c12f93-d14c-4005-b671-e40030a3aa2c">https://open.canada.ca/data/en/dataset/01c12f93-d14c-4005-b671-e40030a3aa2c</a>                                                                                                     |
| ComBase (A Web Resource for Quantitative and Predictive Food Microbiology)                | <a href="https://www.combase.cc/index.php/en">https://www.combase.cc/index.php/en</a>                                                                                                                                                                                     |
| EFSA consumption database                                                                 | <a href="https://www.efsa.europa.eu/en/data-report/food-consumption-data">https://www.efsa.europa.eu/en/data-report/food-consumption-data</a>                                                                                                                             |
| EFSA/ECDC WGS platforms                                                                   | <a href="https://www.ecdc.europa.eu/en/publications-data/collection-and-analysis-whole-genome-sequencing-data-food-borne-pathogens-and">https://www.ecdc.europa.eu/en/publications-data/collection-and-analysis-whole-genome-sequencing-data-food-borne-pathogens-and</a> |
| EFSA PRIMo                                                                                | <a href="https://www.efsa.europa.eu/en/applications/pesticides/tools">https://www.efsa.europa.eu/en/applications/pesticides/tools</a>                                                                                                                                     |
| Epidemic Intelligence Information System (EPIS)                                           | <a href="https://www.ecdc.europa.eu/en/publications-data/epidemic-intelligence-information-system-epis">https://www.ecdc.europa.eu/en/publications-data/epidemic-intelligence-information-system-epis</a>                                                                 |
| Epipulse data on foodborne outbreaks (European Centre for Disease Prevention and Control) | <a href="https://www.ecdc.europa.eu/en/publications-data/epipulse-european-surveillance-portal-infectious-diseases">https://www.ecdc.europa.eu/en/publications-data/epipulse-european-surveillance-portal-infectious-diseases</a>                                         |
| EU RASFF                                                                                  | <a href="https://webgate.ec.europa.eu/rasff-window/screen/search">https://webgate.ec.europa.eu/rasff-window/screen/search</a>                                                                                                                                             |

| <b>Data Source</b>                                                                                                                                                                                                                                                           | <b>Internet Reference</b>                                                                                                                                                                                                                                                                                                                                                                                                                                                                                                                                                                       |
|------------------------------------------------------------------------------------------------------------------------------------------------------------------------------------------------------------------------------------------------------------------------------|-------------------------------------------------------------------------------------------------------------------------------------------------------------------------------------------------------------------------------------------------------------------------------------------------------------------------------------------------------------------------------------------------------------------------------------------------------------------------------------------------------------------------------------------------------------------------------------------------|
| FAO Good Hygiene Practices                                                                                                                                                                                                                                                   | <a href="https://www.fao.org/good-hygiene-practices-haccp-toolbox/how-to-use/en">https://www.fao.org/good-hygiene-practices-haccp-toolbox/how-to-use/en</a>                                                                                                                                                                                                                                                                                                                                                                                                                                     |
| FAO/WHO Food Control System Assessment Tool (five volumes)                                                                                                                                                                                                                   | <a href="http://www.fao.org/publications/card/es/c/CA5334en">http://www.fao.org/publications/card/es/c/CA5334en</a> ;<br><a href="http://www.fao.org/documents/card/es/c/ca5336en">http://www.fao.org/documents/card/es/c/ca5336en</a> ;<br><a href="http://www.fao.org/documents/card/es/c/ca5346en">http://www.fao.org/documents/card/es/c/ca5346en</a> ;<br><a href="http://www.fao.org/documents/card/es/c/ca5348en">http://www.fao.org/documents/card/es/c/ca5348en</a> ;<br><a href="http://www.fao.org/documents/card/es/c/ca5404en">http://www.fao.org/documents/card/es/c/ca5404en</a> |
| FAO/WHO INFOSAN (access to platform is restricted to INFOSAN members who are Emergency Contact Points (ECP) – designated officials from a food safety competent authority in a country and Focal Point(s) – from institutions with role in food safety in various countries) | <a href="https://www.fao.org/food-safety/emergencies/infosan/en/">https://www.fao.org/food-safety/emergencies/infosan/en/</a>                                                                                                                                                                                                                                                                                                                                                                                                                                                                   |
| FoodSafety4EU platform for the EU project                                                                                                                                                                                                                                    | <a href="https://foodsafety4.eu/">https://foodsafety4.eu/</a>                                                                                                                                                                                                                                                                                                                                                                                                                                                                                                                                   |
| Food Safety Research Information Office (FSRIO)                                                                                                                                                                                                                              | <a href="https://www.nal.usda.gov/programs/fsrio">https://www.nal.usda.gov/programs/fsrio</a>                                                                                                                                                                                                                                                                                                                                                                                                                                                                                                   |
| FOSCOLLAB Platform                                                                                                                                                                                                                                                           | <a href="https://apps.who.int/foscollab">https://apps.who.int/foscollab</a>                                                                                                                                                                                                                                                                                                                                                                                                                                                                                                                     |
| The Interagency Risk Assessment Consortium (IRAC)                                                                                                                                                                                                                            | <a href="https://www.foodrisk.org/irac/home">https://www.foodrisk.org/irac/home</a>                                                                                                                                                                                                                                                                                                                                                                                                                                                                                                             |

| <b>Data Source</b>                                    | <b>Internet Reference</b>                                                                                                                                                                                                                                 |
|-------------------------------------------------------|-----------------------------------------------------------------------------------------------------------------------------------------------------------------------------------------------------------------------------------------------------------|
| The Interagency Risk Assessment Consortium – Training | <a href="https://jifsan.umd.edu/training/international/IRAC">https://jifsan.umd.edu/training/international/IRAC</a>                                                                                                                                       |
| MicroHibro                                            | <a href="https://microhibro.com/en/">https://microhibro.com/en/</a>                                                                                                                                                                                       |
| NORMAN suspect exchange list                          | <a href="https://www.norman-network.com/?q=suspect-list-exchange">https://www.norman-network.com/?q=suspect-list-exchange</a>                                                                                                                             |
| WHO GEMS food database                                | <a href="https://www.who.int/teams/nutrition-and-food-safety/databases/global-environment-monitoring-system-food-contamination">https://www.who.int/teams/nutrition-and-food-safety/databases/global-environment-monitoring-system-food-contamination</a> |
| WHO's Epidemic Intelligence from Open Sources         | <a href="https://www.who.int/initiatives/eios">https://www.who.int/initiatives/eios</a>                                                                                                                                                                   |
